# Supplementary material for: Effect of a Mediterranean Diet or Mindfulness-Based Stress Reduction During Pregnancy on Child Neurodevelopment: A Prespecified Analysis of the IMPACT BCN Randomized Clinical Trial
Source: PubMed Central journal article supplement — JAMA Netw Open. 2023 Aug 22;6(8):e2330255. doi: 10.1001/jamanetworkopen.2023.30255 (PMC10445211; doi:10.1001/jamanetworkopen.2023.30255), 2023-08-22
Supplement: jamanetwopen-e2330255-s002.pdf [file jamanetwopen-e2330255-s002.pdf]

## Supplemental Online Content

Crovetto F, Nakaki A, Arranz A, et al. Effect of a Mediterranean diet or mindfulness-based stress reduction during pregnancy on child neurodevelopment: a prespecified analysis of the IMPACT BCN randomized clinical trial. *JAMA Netw Open*. 2023;6(8):e2330255.  
doi:10.1001/jamanetworkopen.2023.30255

### eMethods

### eResults

**eTable 1.** Maternal, neonatal and infants' characteristics of individuals who did not participate in the Bayley Scales of Infant and Toddler Development, 3rd edition (Bayley-III) assessment, according to intervention groups (n=558)

**eTable 2.** Adjusted comparisons of Bayley Scales of Infant and Toddler Development examination (Bayley-III) of infants according to intervention groups (n=626)

**eTable 3.** Comparison of Bayley Scales of Infant and Toddler Development examination, 3rd edition (Bayley-III) comparing appropriate versus small for gestational age newborns (n=626)

**eTable 4.** Maternal Mediterranean diet adherence and fatty acid intake at the final visit adjusted by baseline assessment per intervention group (n=543)

**eTable 5.** Maternal biomarkers of Mediterranean diet adherence at the final visit adjusted by baseline assessment per intervention group (n=291)

**eTable 6.** Associations between fatty acids intake according to Spanish food consumption (tertiles) at final assessment during pregnancy (34-36 weeks' gestation) and the infant Bayley-III results in the whole study population (n=543)

**eTable 7.** Association between biomarkers related to Mediterranean diet at 34-36 weeks' gestation and the infant Bayley-III results in the whole study population (n=290)

**eTable 8.** Maternal lifestyle questionnaires and biological sample related to maternal stress, well-being and mindful state at the final visit adjusted by baseline assessment per intervention group

**eTable 9.** Association between maternal mindful state (FFMQ) at final assessment during pregnancy (34-36 weeks' gestation) and the infant Bayley-III results in the whole study population (n=587)

**eFigure 1.** Associations between maternal Mediterranean diet adherence scores during pregnancy and the infant Bayley-III domain scores

**eFigure 2.** Associations between maternal stress/anxiety questionnaires and the infant Bayley-III scores

**eFigure 3.** Associations between infant Bayley-III scores and maternal WHO-5 score

**eFigure 4.** Associations between infant Bayley-III scores and maternal 24h-urinary cortisone/cortisol ratio

**eFigure 5.** Mediation analysis models of intervention mechanisms\*, Casual Model 1

**eFigure 6.** Mediation analysis models of intervention mechanisms\*, Casual Model 2

**eFigure 7.** Mediation analysis models of intervention mechanisms\*, Casual Model 3

**eFigure 8.** Mediation analysis models of intervention mechanisms\*, Casual Model 4

**eFigure 9.** Mediation analysis models of intervention mechanisms\*, Casual Model 5

**eFigure 10.** Mediation analysis models of intervention mechanisms\*, Casual Model 6

### eReferences

This supplemental material has been provided by the authors to give readers additional information about their work.

## eMethods

### Participant Selection

All pregnant individuals attending routine second trimester ultrasonography scans from 19.0 through 23.6 weeks' gestation were screened for eligibility under the Royal College of Obstetrics and Gynaecologists criteria of being at risk for SGA during pregnancy<sup>1</sup>.

In order to be eligible, they had to fulfill one major criterion and/or three minor criteria. Inclusion criteria were age 18 years or older, fluency in Spanish language, singleton pregnancy, positive fetal heart rate at the time of ultrasonography, and high risk of newborns with SGA according to the adapted criteria of the Royal College of Obstetricians and Gynaecologists for SGA. Exclusion criteria were fetal anomalies, including chromosomal abnormalities, structural malformations, and congenital infections, detected prenatally; neonatal malformations or congenital anomalies diagnosed after birth; inability to perform additional visits; participation in another trial; and maternal intellectual disability or other mental or major psychiatric disorders requiring therapy during pregnancy.

Participants were analyzed according to their randomization group, excluding from analysis those who withdrew consent for participation in the trial and those whose fetuses/neonates had a malformation diagnosed during pregnancy or in the postnatal period.

### Randomization

Participants were randomized using an online central randomization service. Allocation concealment was ensured, as the service did not release the randomization code until the participant was recruited into the trial, which took place after eligibility had been confirmed and consent form signed. Randomization was requested by the investigator responsible for recruitment. A different investigator, responsible for allocation, generated the allocation sequence using an online central randomization service. The investigator responsible for allocation found out the study arm and gave the information about intervention allocation to the participant. Participants were randomly assigned to either Usual care, Mediterranean diet, or Mindfulness-Based Stress Reduction (stress reduction) with a 1:1:1 allocation as per computerized random number generator, with equal proportion in each group. The randomization strategy used in this trial was the simple randomization, restricting for an equal number of patients required in each treatment group at the end of the trial.

### Mediation analyses

Parametric Mediation analyses was conducted to generate evidence about the mechanisms by which interventions may influence the outcomes. We defined as mediating variables the Mediterranean diet adherence score (obtained from a 17-item dietary assessment questionnaire) and Perceived Stress score (obtained from Perceived Stress scale, PSS). In addition, we performed models with the biomarkers of walnuts consumption (oleic acid concentration), extra virgin olive oil consumption (hydroxytyrosol concentration) and the maternal stress (cortisone/ cortisol ratio) at the final visit. We defined as outcomes cognitive and socio-emotional Bayley-III scores. The sample sizes of the biomarkers will be significantly reduced due to the number of subsample of participants who provided the biomarkers, randomly selected from the three study groups. Thus, the results should be considered with caution. The estimation of Average Causal Mediation Effects, Average Direct Effects, the Total Effects and the Proportion Mediated effects were computed for each of 1000 bootstrapped resamples, and the 95% confidence interval was computed by determining 2.5th and 97.5th percentiles for the resamples<sup>2</sup>. The mediation analysis was done with mediation package version 4.5.03.

## eResults

Individuals non attending the Bayley Scales of Infant and Toddler Development assessment.

Among all individuals included in the trial, 558 (47%) did not participate to the Bayley III assessment. Maternal and perinatal characteristics of individuals who refused/non-responded are displayed in eTable 1, showing similar characteristics among the study groups with the exception of SGA prevalence. Individuals who did not participate in the postnatal follow-up had similar maternal and perinatal characteristics as those who participated in the follow-up, with the exception for a younger maternal age (Non-participants 35.6 years vs. Participants 37.8 years,  $p < 0.001$ ), lower rate of white ethnicity (74.9% vs. 81.9%,  $p = 0.04$ ), and higher rate of low socio-economic status (9.0% vs. 4.8%,  $p = 0.01$ ) as compared to those who attended the postnatal follow-up.

Bayley Scales of Infant and Toddler Development, 3rd edition (Bayley-III)

Infants from the Mediterranean diet group had significantly higher scores in the cognitive and social-emotional domains, and those from the stress reduction group had significantly higher scores in the social-emotional domain, compared to controls when adjusting for maternal socioeconomic status and fetal sex (eTable 2).

The evaluation of Mediterranean diet adherence and maternal adherence to the Mediterranean diet intervention

Participants belonged to the Mediterranean diet intervention showed higher scores to Mediterranean diet adherence and higher consumption of fatty acids at final assessment, compared to the usual care group (eTable 4); this was also reflected by related biomarkers of walnuts consumption, particularly  $\alpha$ -Linolenic acid (eTable 5). Stress reduction group

mothers also showed improvements in several fatty acids' intakes; however, they were not significantly different compared to the usual care group. Among the Mediterranean diet group participants, 155 (71.8%) women had high adherence to the intervention.

#### Infant Bayley-III and maternal fatty acids' intake and nutritional biomarkers

There was a positive association with several Bayley-III domains and Mediterranean diet adherence score (eFigure 1) and fatty acids' intake. We reported in eTable 6 the comparison between lower (T1) vs higher intake (T3) of fatty acids according to Spanish food consumption databases<sup>4,5</sup>: after adjustment by variables considered predictable of neurodevelopment at 24 months (mother's socioeconomic status, gestational age at delivery, birthweight, fetal sex, and breastfeeding over 4 months) and also by energy intake, a higher consumption of monounsaturated fatty acids (MUFA) was associated with higher score in the cognitive and motor domain; a higher consumption of saturated fatty acids (SFA) with a better motor score; a higher consumption of Eicosapentaenoic acid (EPA) and Docosahexaenoic acid (DHA) with a better language domain; and finally, a higher consumption of trans-fatty acids with a higher social-emotional domain.

Regarding nutritional biomarkers in the whole study population, only oleic acid had positive associations with adaptive behavior domain ( $\beta$  (95%CI); 0.62 (0.19 to 1.03);  $p=0.004$ ) (eTable 7).

#### The evaluation of stress and anxiety and maternal adherence to the stress reduction intervention

Women belonged to the stress reduction group had significantly lower State-Trait Anxiety Inventory (STAI) personality and STAI anxiety scores, and significantly higher scores on the Five Facet Mindfulness Questionnaire (FFMQ) observation, FFMQ non-judgmental and FFMQ non-reactivity scores at final assessment, compared to the usual care group (eTable 8). This was also reflected by the urinary biomarker related to stress: higher 24h urinary cortisone/cortisol ratio in the stress reduction group compared with the usual care group (eTable 8). Among the stress reduction group participants, 137 (63.7%) women had high adherence to the intervention (prespecified in the Statistical Analysis Plan).

#### Infant Bayley-III and maternal stress, well-being, and mindful state during pregnancy

Associations of infant Bayley-III cognitive domains with perceived stress, STAI personality and anxiety are displayed in eFigures 2, with maternal WHO-5 wellbeing in eFigure 3, with cortisone/cortisol in eFigure 4; and with FFMQ in eTable 9.

#### Mediation analysis

In the Mediterranean diet group, the intervention had significant total effect on Bayley cognitive domain (eFigure 5, Casual Model 1) and social-emotional domain (eFigure 6, Casual Model 2). Mediterranean diet adherence score at the final visit had a high proportion mediated on the cognitive domain (78%, eFigure 5), and it had low proportion mediated on the social-emotional domain (44%, eFigure 6). Casual Model 3 showed that the PSS measure at the final visit showed low proportion mediated on the Bayley social-emotional domain (6.7%, eFigure 7). Regarding the casual models with the biomarkers (available only in a subsample with reduced sample size), the intervention had borderline or non-significant total effects on the Bayley outcomes (eFigure 8, Casual Model 4 and eFigure 9, Casual Model 5). In Casual Model 4, oleic acid concentration at the final visit had a very low proportion mediated on the cognitive domain (0.5%) and on the social-emotional domain (11%) (eFigure 8). In Casual Model 5, the hydroxycortisol concentration at the final visit had low proportion mediated on the cognitive domain (3.2%) and the social-emotional domain (3.1%) (eFigure 9).

In the Stress reduction group, the intervention had significant total effect on the social-emotional domain in both Casual Model 2 and 3. The proportion mediated of the Mediterranean diet adherence score on social-emotional domain was very low (4.7%, eFigure 6), as well as proportion mediated of the PSS measure at the final visit (0.4%, eFigure 7). Regarding the casual model with the biomarker (available only in a subsample with reduced sample size) (eFigure 10, Casual Model 6), the intervention did not have a significant effect on the social-emotional domain, and the cortisone/cortisol ratio had low proportion mediated on the outcome (60%, eFigure 10).

eTable 1. Maternal, neonatal and infants' characteristics of individuals who did not participate in the Bayley Scales of Infant and Toddler Development, 3rd edition (Bayley-III) assessment, according to intervention groups (n=558)

|                                           | Mediterranean Diet | Stress reduction   | Usual care         | Mediterranean Diet vs. Usual care | Stress reduction vs. Usual care |
|-------------------------------------------|--------------------|--------------------|--------------------|-----------------------------------|---------------------------------|
|                                           | n=174              | n=176              | n=208              | p value                           | p value                         |
| <b>Maternal Characteristics</b>           |                    |                    |                    |                                   |                                 |
| Age (years)                               | 35.5 (5.6)         | 35.7 (5.6)         | 35.6 (5.7)         | 0.88                              | 0.81                            |
| Race and ethnicity                        |                    |                    |                    | 0.16                              | 0.59                            |
| Afro-American                             | 6 (3.4%)           | 5 (2.8%)           | 3 (1.4%)           |                                   |                                 |
| Asian                                     | 6 (3.4%)           | 1 (0.6%)           | 3 (1.4%)           |                                   |                                 |
| Latin American                            | 23 (13.2%)         | 39 (22.2%)         | 39 (18.8%)         |                                   |                                 |
| Maghreb                                   | 2 (1.1%)           | 7 (4.0%)           | 6 (2.9%)           |                                   |                                 |
| White                                     | 137 (78.7%)        | 124 (70.5%)        | 157 (75.5%)        |                                   |                                 |
| Socio-economic status <sup>a</sup>        |                    |                    |                    | 0.97                              | 0.15                            |
| Low                                       | 13 (7.5%)          | 22 (12.5%)         | 15 (7.2%)          |                                   |                                 |
| Medium                                    | 72 (41.4%)         | 74 (42.0%)         | 84 (40.4%)         |                                   |                                 |
| High                                      | 89 (51.1%)         | 80 (45.5%)         | 109 (52.4%)        |                                   |                                 |
| Education                                 |                    |                    |                    | 0.93                              | 0.15                            |
| None/primary                              | 13 (7.5%)          | 22 (12.5%)         | 15 (7.2%)          |                                   |                                 |
| Secondary/technology                      | 69 (39.7%)         | 70 (39.8%)         | 79 (38.0%)         |                                   |                                 |
| University                                | 92 (52.9%)         | 84 (47.7%)         | 114 (54.8%)        |                                   |                                 |
| Cigarette smoking                         | 46 (26.4%)         | 36 (20.5%)         | 57 (27.4%)         | 0.83                              | 0.11                            |
| Alcohol intake                            | 16 (9.2%)          | 19 (10.8%)         | 25 (12.0%)         | 0.37                              | 0.71                            |
| Drugs consumption                         | 3 (1.7%)           | 2 (1.1%)           | 3 (1.4%)           | 0.82                              | 0.79                            |
| <b>Neonatal Characteristics</b>           |                    |                    |                    |                                   |                                 |
| Sex                                       |                    |                    |                    | 0.63                              | 0.96                            |
| Female                                    | 84 (48.3%)         | 84 (47.7%)         | 97 (46.6%)         |                                   |                                 |
| Male                                      | 90 (51.7%)         | 92 (52.3%)         | 122 (53.4%)        |                                   |                                 |
| Gestational age at delivery (weeks)       | 39.6 (38.7 - 40.4) | 39.7 (39.0 - 40.5) | 39.4 (38.3 - 40.3) | 0.11                              | 0.007                           |
| Cesarean section                          | 65 (37.6%)         | 67 (32.2%)         | 56 (29.8%)         | 0.24                              | 0.93                            |
| Birthweight (g)                           | 3180.1 (522.7)     | 3215.9 (474.1)     | 3090.3 (691.2)     | 0.16                              | 0.04                            |
| Birthweight percentile                    | 42.8 (30.3)        | 42.7 (30.5)        | 41.3 (31.2)        | 0.63                              | 0.65                            |
| Small for gestational age (<10th centile) | 20 (11.5%)         | 28 (15.9%)         | 48 (23.1%)         | 0.008                             | 0.21                            |
| Apgar 5 minutes <7                        | 1 (0.6%)           | 3 (1.7%)           | 3 (1.4%)           | 0.35                              | 0.97                            |
| Umbilical artery pH                       | 7.21 (0.08)        | 7.21 (0.08)        | 7.21 (0.09)        | 0.79                              | 0.96                            |
| Neonatal Intensive Care Unit admission    | 10 (5.7%)          | 6 (3.4%)           | 16 (7.7%)          | 0.31                              | 0.18                            |

Data are expressed as mean (SD) or median (IQR) or n (%).

<sup>a</sup>Socioeconomical status: low (never work or unemployed >2ys); medium (secondary studies & work); high (university studies & work).

eTable 2. Adjusted comparisons of Bayley Scales of Infant and Toddler Development examination (Bayley-III) of infants according to intervention groups (n=626)

|                                  | Mediterranean diet<br>n=218 | Stress reduction<br>n=215 | Usual care<br>n=193 | Mediterranean diet<br>vs. Usual care |         | Stress reduction<br>vs. Usual care |         |
|----------------------------------|-----------------------------|---------------------------|---------------------|--------------------------------------|---------|------------------------------------|---------|
|                                  |                             |                           |                     | Adjusted mean difference (95% CI)    | p value | Adjusted mean difference (95% CI)  | p value |
| Bayley-III domains               |                             |                           |                     |                                      |         |                                    |         |
| Cognitive composite score        | 123.6 (17.8)                | 119.3 (19.6)              | 118.6 (18.3)        | 4.15 (0.71 to 7.60)                  | 0.01    | 0.34 (-3.28 to 3.97)               | 0.18    |
| Cognitive score below 85         | 2 (0.9%)                    | 8 (3.7%)                  | 7 (3.6%)            |                                      | 0.06    |                                    | 0.96    |
| Language composite score         | 107.9 (19.2)                | 104.7 (17.7)              | 105.5 (17.0)        | 1.53 (-1.89 to 4.97)                 | 0.38    | -0.84 (-4.10 to 2.41)              | 0.60    |
| Language score below 85          | 15 (6.9%)                   | 19 (8.9%)                 | 16 (8.5%)           |                                      | 0.55    |                                    | 0.86    |
| Motor composite score            | 113.3 (14.4)                | 113.4 (13.9)              | 114.7 (13.8)        | -1.78 (-4.51 to 0.95)                | 0.20    | -1.46 (-4.16 to 1.23)              | 0.28    |
| Motor score below 85             | 0 (0.0%)                    | 1 (0.5%)                  | 3 (1.6%)            |                                      | 0.06    |                                    | 0.27    |
| Social-emotional composite score | 108.6 (22.0)                | 108.2 (24.0)              | 103.4 (18.5)        | 4.52 (0.56 to 8.48)                  | 0.02    | 4.38 (0.23 to 8.53)                | 0.03    |
| Social-emotional score below 85  | 24 (11.1%)                  | 23 (10.7%)                | 28 (14.5%)          |                                      | 0.30    |                                    | 0.25    |
| Adaptive composite score         | 94.8 (16.3)                 | 93.0 (16.5)               | 94.0 (15.5)         | 0.14 (-2.93 to 3.22)                 | 0.92    | -1.12 (-4.24 to 1.99)              | 0.47    |
| Adaptive score below 85          | 50 (23.1%)                  | 58 (26.9%)                | 51 (26.4%)          |                                      | 0.44    |                                    | 0.90    |

Data are expressed as mean (SD) or n (%). CI denotes for Confidence interval.  
p values were generated from a regression model adjusted for: socioeconomic status and fetal sex.  
Language n=620, Motor n=625, Social-Emotional=n=624, Adaptive behavior n=624.

eTable 3. Comparison of Bayley Scales of Infant and Toddler Development examination, 3rd edition (Bayley-III) comparing appropriate versus small for gestational age newborns (n=626)

|                                  | Appropriate for gestational age<br>n=519 | Small for gestational age<br>n=107 | Adjusted mean difference (95% CI) | p value |
|----------------------------------|------------------------------------------|------------------------------------|-----------------------------------|---------|
| <b>Bayley-III domains</b>        |                                          |                                    |                                   |         |
| Cognitive composite score        | 120.5 (18.9)                             | 121.0 (17.9)                       | -0.48 (-4.38 to 3.42)             | 0.80    |
| Cognitive score below 85         | 31 (6.0%)                                | 5 (4.7%)                           |                                   | 0.60    |
| Language composite score         | 105.9 (18.1)                             | 106.9 (18.0)                       | -1.05 (-4.82 to 2.71)             | 0.58    |
| Language score below 85          | 110 (21.5%)                              | 27 (25.2%)                         |                                   | 0.63    |
| Motor composite score            | 113.8 (14.2)                             | 113.5 (13.5)                       | 0.33 (-2.59 to 3.26)              | 0.82    |
| Motor score below 85             | 26 (5.0%)                                | 7 (6.5%)                           |                                   | 0.52    |
| Social-emotional composite score | 107.6 (22.3)                             | 103.4 (18.9)                       | 4.22 (-0.31 to 8.76)              | 0.07    |
| Social-emotional score below 85  | 85 (16.4%)                               | 17 (15.9%)                         |                                   | 0.89    |
| Adaptive composite score         | 94.2 (16.2)                              | 92.7 (15.8)                        | 1.42 (-1.93 to 4.79)              | 0.40    |
| Adaptive score below 85          | 184 (35.6%)                              | 43 (40.2%)                         |                                   | 0.37    |

Data are expressed as mean (SD) or n (%). CI denotes for Confidence interval.  
p values were generated from a regression model adjusted for: socioeconomic status and fetal sex.  
Language n=620, Motor n=625, Social-Emotional=n=624, Adaptive behavior n=624

eTable 4. Maternal Mediterranean diet adherence and fatty acid intake at the final visit adjusted by baseline assessment per intervention group (n=543)

|                                     |           | Mediterranean diet<br>(N=198) | Stress reduction<br>(N=177) | Usual care<br>(N=168) | pc     | Mediterranean diet vs. Usual care<br>Adjusted mean difference (95% CI) | Stress reduction vs. Usual care<br>Adjusted mean difference (95% CI) | Mediterranean diet vs. Stress reduction<br>Adjusted mean difference (95% CI) |
|-------------------------------------|-----------|-------------------------------|-----------------------------|-----------------------|--------|------------------------------------------------------------------------|----------------------------------------------------------------------|------------------------------------------------------------------------------|
| Mediterranean diet adherence score+ | Baselinea | 8.01 (2.62)                   | 7.60 (2.62)                 | 7.56 (2.61)           |        |                                                                        |                                                                      |                                                                              |
|                                     | Finalb    | 12.4 (0.15)**                 | 8.23 (0.15)*                | 7.90 (0.16)           | <0.001 | -4.45 (-4.88 to -4.02)                                                 | -0.33 (-0.76 to 0.10)                                                | -4.12 (-4.53 to -3.70)                                                       |
| SFA – g/day                         | Baselinea | 34.1 (10.1)                   | 34.9 (9.78)                 | 34.1 (9.23)           |        |                                                                        |                                                                      |                                                                              |
|                                     | Finalb    | 36.8 (0.58)**                 | 35.5 (0.61)                 | 35.5 (0.63)           | 0.19   | 1.32 (-0.34 to 3.00)                                                   | 0.02 (-1.69 to 1.74)                                                 | 1.30 (-0.34 to 2.95)                                                         |
| MUFA – g/day                        | Baselinea | 60.9 (15.0)                   | 62.0 (14.8)                 | 61.6 (15.5)           |        |                                                                        |                                                                      |                                                                              |
|                                     | Finalb    | 67.2 (0.87)**                 | 64.8 (0.92)*                | 63.1 (0.94)           | 0.006  | 4.04 (1.53 to 6.56)                                                    | 1.64 (-0.94 to 4.22)                                                 | 2.40 (-0.08 to 4.88)                                                         |
| PUFA – g/day                        | Baselinea | 21.7 (7.59)                   | 21.9 (7.52)                 | 23.3 (8.28)           |        |                                                                        |                                                                      |                                                                              |
|                                     | Finalb    | 28.3 (0.48)**                 | 21.6 (0.51)                 | 22.9 (0.52)           | <0.001 | 5.38 (3.98 to 6.77)                                                    | -1.30 (-2.72 to 0.13)                                                | 6.67 (5.31 to 8.04)                                                          |
| α-Linoleic acid – g/day             | Baselinea | 14.2 (5.71)                   | 14.3 (6.70)                 | 15.4 (6.26)           |        |                                                                        |                                                                      |                                                                              |
|                                     | Finalb    | 18.5 (0.36)**                 | 14.1 (0.38)                 | 15.3 (0.39)           | <0.001 | 3.29 (2.24 to 4.34)                                                    | -1.16 (-2.24 to -0.08)                                               | 4.45 (3.42 to 5.48)                                                          |
| α-Linolenic acid – g/day            | Baselinea | 1.40 (0.58)                   | 1.36 (0.63)                 | 1.40 (0.62)           |        |                                                                        |                                                                      |                                                                              |
|                                     | Finalb    | 2.38 (0.04)**                 | 1.37 (0.04)                 | 1.43 (0.04)           | <0.001 | 0.95 (0.83 to 1.07)                                                    | -0.06 (-0.18 to 0.06)                                                | 1.01 (0.89 to 1.13)                                                          |
| EPA – g/day                         | Baselinea | 0.17 (0.12)                   | 0.15 (0.09)                 | 0.15 (0.10)           |        |                                                                        |                                                                      |                                                                              |
|                                     | Finalb    | 26.7 (0.01)**                 | 0.17 (0.01)*                | 0.16 (0.01)           | <0.001 | 0.10 (0.08 to 0.12)                                                    | 0.01 (-0.02 to 0.03)                                                 | 0.10 (0.08 to 0.12)                                                          |
| DHA – g/day                         | Baselinea | 0.35 (0.28)                   | 0.31 (0.23)                 | 0.31 (0.24)           |        |                                                                        |                                                                      |                                                                              |
|                                     | Finalb    | 0.60 (0.02)**                 | 0.36 (0.02)*                | 0.34 (0.02)           | <0.001 | 0.25 (0.20 to 0.30)                                                    | 0.02 (-0.04 to 0.07)                                                 | 0.23 (0.18 to 0.28)                                                          |
| Trans-fatty acids – g/day           | Baselinea | 1.67 (1.21)                   | 1.65 (1.08)                 | 1.68 (1.17)           |        |                                                                        |                                                                      |                                                                              |
|                                     | Finalb    | 1.30 (0.07)**                 | 1.60 (0.07)                 | 1.68 (0.07)           | <0.001 | -0.38 (-0.57 to -0.19)                                                 | -0.08 (-0.27 to 0.12)                                                | -0.30 (-0.49 to -0.11)                                                       |

CI denotes Confidence interval, SFA Saturated fatty acids, MUFA Monounsaturated fatty acids, PUFA Polyunsaturated fatty acids, EPA Eicosapentaenoic acid, DHA Docosahexaenoic acid.

+Mediterranean diet adherence score was available for 612 participants (n=216 Mediterranean diet, n=206 Stress reduction, n=190 Usual care).

aBaseline values are observed means (SD). bFinal values are baseline-adjusted (least-squares) means (SE) and comparison among groups done with ANCOVA analysis.

\*P<0.05 and \*\*P<0.001 final comparison adjusted for baseline values. cANCOVA analysis for the final assessment.

eTable 5. Maternal biomarkers of Mediterranean diet adherence at the final visit adjusted by baseline assessment per intervention group (n=291)

|                                                       |                       | Mediterranean diet<br>(N=95) | Stress reduction<br>(N=105) | Usual care<br>(N=91) | pc     | Mediterranean diet vs. Usual care<br>Adjusted mean difference (95% CI) | Stress reduction vs. Usual care<br>Adjusted mean difference (95% CI) | Mediterranean diet vs. Stress reduction<br>Adjusted mean difference (95% CI) |
|-------------------------------------------------------|-----------------------|------------------------------|-----------------------------|----------------------|--------|------------------------------------------------------------------------|----------------------------------------------------------------------|------------------------------------------------------------------------------|
| Oleic acid $\mu\text{mol/g}$ creatinine               | Baseline <sup>a</sup> | 20.92 (3.91)                 | 20.86 (4.03)                | 21.20 (4.41)         |        |                                                                        |                                                                      |                                                                              |
|                                                       | Final <sup>b</sup>    | 22.1 (0.28)*                 | 22.5 (0.27)*                | 22.6 (0.29)*         | 0.29   | -0.42 (0.22 to 0.38)                                                   | -0.07 (-0.83 to 0.69)                                                | 0.34 (-0.42 to 1.10)                                                         |
| $\alpha$ -Linoleic acid $\mu\text{mol/g}$ creatinine  | Baseline <sup>a</sup> | 28.37 (4.12)                 | 28.31 (4.36)                | 27.86 (3.49)         |        |                                                                        |                                                                      |                                                                              |
|                                                       | Final <sup>b</sup>    | 28.3 (0.36)*                 | 26.6 (0.34)*                | 27.1 (0.37)          | 0.002  | 1.12 (0.10 to 2.13)                                                    | -0.57 (-0.55 to 0.41)                                                | -1.69 (-2.67 to -0.71)                                                       |
| $\alpha$ -Linolenic acid $\mu\text{mol/g}$ creatinine | Baseline <sup>a</sup> | 0.37 (0.16)                  | 0.35 (0.14)                 | 0.36 (0.14)          |        |                                                                        |                                                                      |                                                                              |
|                                                       | Final <sup>b</sup>    | 0.54 (0.01)**                | 0.36 (0.01)                 | 0.38 (0.01)          | <0.001 | 0.15 (0.11 to 0.18)                                                    | -0.02 (-0.05 to 0.01)                                                | -0.19 (-0.22 to -0.15)                                                       |
| OH-TY $\mu\text{mol/g}$ creatinine                    | Baseline <sup>a</sup> | 0.42 (1.60)                  | 0.31 (0.86)                 | 0.26 (0.83)          |        |                                                                        |                                                                      |                                                                              |
|                                                       | Final <sup>b</sup>    | 1.64 (0.23)**                | 0.96 (0.22)*                | 1.21 (0.23)**        | 0.10   | 0.42 (-0.22 to 1.06)                                                   | -0.25 (-0.87 to 0.37)                                                | -0.68 (1.30 to -0.05)                                                        |
| 4'-O-Glu_OH-TY $\mu\text{mol/g}$ creatinine           | Baseline <sup>a</sup> | 1.52 (2.03)                  | 2.08 (3.98)                 | 1.65 (3.36)          |        |                                                                        |                                                                      |                                                                              |
|                                                       | Final <sup>b</sup>    | 1.96 (0.35)                  | 1.68 (0.33)                 | 1.60 (0.35)          | 0.81   | 0.34 (-0.64 to 1.32)                                                   | 0.08 (-0.88 to 1.04)                                                 | -0.25 (-1.19 to 0.69)                                                        |
| 3'-O-Glu_OH-TY $\mu\text{mol/g}$ creatinine           | Baseline <sup>a</sup> | 2.24 (3.64)                  | 1.90 (3.36)                 | 1.84 (4.05)          |        |                                                                        |                                                                      |                                                                              |
|                                                       | Final <sup>b</sup>    | 0.82 (0.18)**                | 1.10 (0.17)*                | 0.90 (0.18)*         | 0.56   | -0.08 (-0.58 to 0.42)                                                  | 0.19 (-0.30 to 0.68)                                                 | 0.28 (-0.21 to 0.77)                                                         |

OH-TY denotes Hydroxytyrosol, 4'-O-Glu-OH-TY, Urine 4-O-Glucose-Hydroxytyrosol Concentration; 3'-O-Glu-OH-TY, Urine 3-O-Glucose-Hydroxytyrosol Concentration.

<sup>a</sup>Baseline values are observed as means (SD).

<sup>b</sup>Final value are baseline-adjusted (least-square) means (SE) and comparison among groups done with ANCOVA analysis. \*P<0.05 and \*\*P<0.001 final comparison adjusted for baseline values. <sup>c</sup>ANCOVA analysis for the final assessment.



eTable 6. Associations between fatty acids intake according to Spanish food consumption (tertiles) at final assessment during pregnancy (34-36 weeks' gestation) and the infant Bayley-III results in the whole study population (n=543)

| Bayley-III assessment | Fatty acids tertiles |              |              | T3 vs. T1                         |         |
|-----------------------|----------------------|--------------|--------------|-----------------------------------|---------|
|                       | T1 (Low)             | T2 (Medium)  | T3 (High)    | Adjusted mean difference (95% CI) | p value |
| <b>MUFA</b>           |                      |              |              |                                   |         |
| Cognitive             | 118.6 (19.1)         | 121.3 (18.0) | 123.1 (18.3) | 4.69 (0.94 to 8.44)               | 0.01    |
| Language              | 105.1 (17.3)         | 107.2 (18.3) | 106.9 (17.6) | 1.92 (-1.71 to 5.55)              | 0.30    |
| Motor                 | 112.8 (14.5)         | 114.4 (14.6) | 115.2 (12.9) | 2.54 (-0.31 to 5.40)              | 0.08    |
| Social-Emotional      | 105.5 (23.0)         | 108.4 (21.2) | 106.6 (21.5) | 1.34 (-3.12 to 5.80)              | 0.55    |
| Adaptive behavior     | 93.4 (15.8)          | 92.8 (15.8)  | 96.1 (16.2)  | 2.89 (-0.36 to 6.13)              | 0.08    |
| <b>PUFA</b>           |                      |              |              |                                   |         |
| Cognitive             | 120.6 (18.8)         | 120.3 (18.1) | 122.2 (18.6) | 1.81 (-1.96 to 3.58)              | 0.34    |
| Language              | 105.8 (18.0)         | 105.7 (16.9) | 107.7 (18.4) | 2.06 (-1.57 to 5.70)              | 0.26    |
| Motor                 | 114.1 (15.2)         | 114.2 (13.5) | 114.0 (13.4) | -0.11 (-2.98 to 2.75)             | 0.93    |
| Social-Emotional      | 106.7 (22.3)         | 106.6 (21.7) | 107.1 (21.8) | 0.51 (-3.96 to 4.99)              | 0.82    |
| Adaptive behavior     | 93.7 (16.3)          | 94.6 (16.0)  | 94.0 (15.8)  | 0.48 (-2.79 to 3.74)              | 0.77    |
| <b>SFA</b>            |                      |              |              |                                   |         |
| Cognitive             | 119.9 (18.4)         | 120.2 (19.5) | 123.0 (17.5) | 3.18 (-0.59 to 6.94)              | 0.09    |
| Language              | 106.3 (17.3)         | 106.9 (18.7) | 106.1 (17.3) | -0.15 (-3.78 to 3.49)             | 0.93    |
| Motor                 | 114.0 (14.7)         | 112.6 (13.9) | 115.8 (13.3) | 1.71 (-1.14 to 4.57)              | 0.23    |
| Social-Emotional      | 107.1 (22.8)         | 107.8 (21.9) | 105.6 (21.1) | -1.10 (-5.58 to 3.38)             | 0.62    |
| Adaptive behavior     | 93.2 (15.9)          | 93.6 (15.2)  | 95.4 (16.9)  | 2.30 (-0.97 to 5.57)              | 0.16    |
| <b>Linoleic acid</b>  |                      |              |              |                                   |         |
| Cognitive             | 120.5 (19.2)         | 119.6 (17.3) | 122.9 (18.8) | 2.45 (-1.30 to 6.21)              | 0.20    |
| Language              | 105.3 (18.5)         | 105.7 (15.7) | 108.1 (18.8) | 2.73 (-0.90 to 6.36)              | 0.14    |
| Motor                 | 114.0 (14.6)         | 114.9 (13.9) | 113.5 (13.6) | -0.45 (-3.32 to 2.41)             | 0.75    |
| Social-Emotional      | 106.6 (22.3)         | 106.6 (22.6) | 107.3 (20.9) | 0.63 (-3.84 to 5.09)              | 0.61    |
| Adaptive behavior     | 93.2 (15.8)          | 94.2 (16.5)  | 94.8 (15.7)  | 1.71 (-1.54 to 4.97)              | 0.30    |
| <b>Linolenic acid</b> |                      |              |              |                                   |         |
| Cognitive             | 119.3 (18.3)         | 120.0 (18.9) | 123.6 (18.0) | 4.17 (0.42 to 7.93)               | 0.02    |
| Language              | 104.0 (17.4)         | 107.1 (17.2) | 108.1 (18.4) | 4.16 (0.54 to 7.78)               | 0.02    |
| Motor                 | 113.6 (14.4)         | 115.9 (13.7) | 112.9 (13.9) | -0.88 (-3.73 to 1.97)             | 0.54    |
| Social-Emotional      | 107.0 (22.8)         | 104.7 (21.9) | 108.8 (20.9) | 1.77 (-2.69 to 6.24)              | 0.43    |
| Adaptive behavior     | 92.7 (15.5)          | 94.4 (16.4)  | 95.1 (16.0)  | 2.35 (-0.91 to 5.61)              | 0.15    |
| <b>EPA</b>            |                      |              |              |                                   |         |
| Cognitive             | 118.7 (18.7)         | 122.3 (17.9) | 122.1 (18.7) | 3.27 (-0.49 to 7.04)              | 0.08    |
| Language              | 103.2 (16.0)         | 107.0 (18.4) | 109.0 (18.4) | 5.45 (1.82 to 9.08)               | <0.001  |
| Motor                 | 113.5 (13.9)         | 114.7 (14.3) | 114.2 (14.0) | 0.65 (-2.22 to 3.53)              | 0.65    |
| Social-Emotional      | 106.2 (22.8)         | 107.4 (21.3) | 106.9 (21.6) | 0.94 (-3.54 to 5.43)              | 0.68    |
| Adaptive behavior     | 92.6 (15.4)          | 94.2 (16.5)  | 95.5 (16.0)  | 2.72 (-0.55 to 5.99)              | 0.10    |
| <b>DHA</b>            |                      |              |              |                                   |         |
| Cognitive             | 118.3 (18.8)         | 122.9 (17.6) | 121.9 (18.8) | 3.30 (-0.46 to 7.07)              | 0.08    |
| Language              | 102.6 (15.9)         | 107.1 (17.5) | 109.5 (19.0) | 6.56 (2.94 to 10.2)               | <0.001  |
| Motor                 | 113.4 (13.9)         | 114.9 (14.3) | 114.1 (13.9) | 0.61 (-2.27 to 3.49)              | 0.67    |

|                   |              |              |              |                        |      |
|-------------------|--------------|--------------|--------------|------------------------|------|
| Social-Emotional  | 105.9 (22.8) | 107.1 (20.7) | 107.5 (22.2) | 1.64 (-2.84 to 6.13)   | 0.47 |
| Adaptive behavior | 92.3 (15.3)  | 94.4 (16.3)  | 95.6 (16.3)  | 2.94 (-0.33 to 6.20)   | 0.07 |
| <hr/>             |              |              |              |                        |      |
| Trans fat         |              |              |              |                        |      |
| Cognitive         | 121.0 (18.7) | 122.2 (18.0) | 119.8 (18.8) | -0.98 (-4.74 to 2.79)  | 0.61 |
| Language          | 108.2 (18.2) | 107.1 (17.8) | 103.8 (17.0) | -4.14 (-7.77 to -0.51) | 0.02 |
| Motor             | 114.2 (14.2) | 115.2 (14.9) | 113.0 (13.0) | -1.29 (-4.16 to 1.57)  | 0.37 |
| Social-Emotional  | 110.1 (20.9) | 106.8 (20.9) | 103.6 (21.9) | -6.27 (-10.7 to -1.82) | 0.01 |
| Adaptive behavior | 94.6 (16.5)  | 94.6 (15.4)  | 93.1 (16.2)  | -1.42 (-4.69 to 1.84)  | 0.39 |

Bayley-III denotes for Bayley Scales of Infant and Toddler Development, 3rd edition, MUFA Monounsaturated fatty acids, PUFA Polyunsaturated fatty acids, SFA Saturated fatty acids, EPA Eicosapentaenoic acid, DHA Docosahexaenoic acid.

P values were generated from a regression model adjusted for: socioeconomic status and fetal sex.

eTable 7. Association between biomarkers related to Mediterranean diet at 34-36 weeks' gestation and the infant Bayley-III results in the whole study population (n=290)

| Bayley-III domain   | Oleic acid           |         | a-Linoleic acid<br>( $\omega$ 6) |         | a-Linolenic acid<br>( $\omega$ 3) |         | Hydroxytyrosol*       |         | 4'-O-Glu-OH-TY*       |         | 3'-O-Glu-OH-TY        |         |
|---------------------|----------------------|---------|----------------------------------|---------|-----------------------------------|---------|-----------------------|---------|-----------------------|---------|-----------------------|---------|
|                     | $\beta$ (95%CI)      | P value | $\beta$ (95%CI)                  | p value | $\beta$ (95%CI)                   | p value | $\beta$ (95%CI)       | p value | $\beta$ (95%CI)       | p value | $\beta$ (95%CI)       | P value |
| Cognitive           | 0.06 (-0.40 to 0.53) | 0.79    | 0.09 (-0.39 to 0.58)             | 0.69    | 1.28 (-9.49 to 12.07)             | 0.81    | -0.21 (-0.70 to 0.27) | 0.38    | 0.25 (-0.61 to 1.11)  | 0.56    | -0.57 (-1.29 to 0.14) | 0.11    |
| Language            | 0.31 (-0.12 to 0.76) | 0.16    | 0.15 (-0.30 to 0.62)             | 0.50    | 3.71 (-6.51 to 13.94)             | 0.47    | 0.13 (-0.32 to 0.60)  | 0.56    | -0.04 (-0.86 to 0.78) | 0.92    | -0.09 (-0.78 to 0.58) | 0.78    |
| Motor               | 0.14 (-0.21 to 0.49) | 0.43    | 0.04 (-0.32 to 0.41)             | 0.81    | 2.37 (-5.74 to 10.49)             | 0.56    | -0.23 (-0.60 to 0.13) | 0.20    | 0.44 (-0.20 to 1.09)  | 0.18    | -0.45 (-0.99 to 0.08) | 0.10    |
| Socio-emotional     | 0.50 (-0.05 to 1.07) | 0.08    | -0.18 (-0.78 to 0.40)            | 0.53    | 7.20 (-5.81 to 20.22)             | 0.27    | -0.50 (-1.09 to 0.08) | 0.09    | -0.64 (-1.68 to 0.40) | 0.23    | 0.27 (-0.60 to 1.14)  | 0.54    |
| Adaptative behavior | 0.61 (0.19 to 1.03)  | 0.004   | 0.20 (-0.24 to 0.64)             | 0.37    | 1.08 (-8.64 to 10.82)             | 0.82    | 0.22 (-0.22 to 0.66)  | 0.32    | 0.34 (-0.43 to 1.12)  | 0.38    | -0.01 (-0.66 to 0.64) | 0.96    |

Bayley-III denotes for Bayley Scales of Infant and Toddler Development, 3rd edition, SE: standard error, 4'-O-Glu-OH-TY: Urine 4-O-Glucose-Hydroxytyrosol Concentration, 3'-O-Glu-OH-TY: Urine 3-O-Glucose-Hydroxytyrosol Concentration.

P values were generated from a regression model adjusted for: socioeconomic status and fetal sex.

eTable 8. Maternal lifestyle questionnaires and biological sample related to maternal stress, well-being and mindful state at the final visit adjusted by baseline assessment per intervention group

|                                             |                       | Mediterranean diet | Stress reduction | Usual care   | pc     | Mediterranean diet vs. Usual care Adjusted mean difference (95% CI) | Stress reduction vs. Usual care Adjusted mean difference (95% CI) | Mediterranean diet vs. Stress reduction Adjusted mean difference (95% CI) |
|---------------------------------------------|-----------------------|--------------------|------------------|--------------|--------|---------------------------------------------------------------------|-------------------------------------------------------------------|---------------------------------------------------------------------------|
| Perceived stress scale score                | Baseline <sup>a</sup> | 15.6 (7.41)        | 16.1 (7.32)      | 15.8 (7.58)  |        |                                                                     |                                                                   |                                                                           |
|                                             | Final <sup>b</sup>    | 15.5 (0.36)        | 16.4 (0.36)      | 16.7 (0.37)  | 0.01   | -1.26 (-2.28 to -0.23)                                              | -0.35 (-0.36 to 0.66)                                             | -0.90 (-1.89 to 0.09)                                                     |
| State-trait Anxiety Inventory (personality) | Baseline <sup>a</sup> | 14.0 (7.45)        | 15.6 (8.51)      | 15.2 (9.07)  |        |                                                                     |                                                                   |                                                                           |
|                                             | Final <sup>b</sup>    | 14.0 (0.37)        | 13.6 (0.37)      | 15.1 (0.38)  | 0.001  | -1.03 (-2.06 to 0.008)                                              | -1.45 (-2.48 to -0.41)                                            | 0.42 (-0.59 to 1.43)                                                      |
| State-trait Anxiety Inventory (anxiety)     | Baseline <sup>a</sup> | 12.8 (8.05)        | 14.1 (8.50)      | 13.4 (8.70)  |        |                                                                     |                                                                   |                                                                           |
|                                             | Final <sup>b</sup>    | 13.7 (0.42)        | 12.6 (0.42)      | 15.2 (0.44)* | <0.001 | -1.53 (-1.72 to 0.66)                                               | -2.60 (-3.79 to -1.40)                                            | 1.06 (-0.09 to 2.21)                                                      |
| WHO Five well-being index                   | Baseline <sup>a</sup> | 67.4 (14.36)       | 65.4 (15.75)     | 64.4 (17.47) |        |                                                                     |                                                                   |                                                                           |
|                                             | Final <sup>b</sup>    | 66.3 (0.90)        | 66.2 (0.91)      | 64.9 (0.94)  | 0.04   | 1.34 (-1.20 to 3.88)                                                | 1.28 (-1.26 to 3.82)                                              | 0.06 (-2.44 to 2.56)                                                      |
| FFMQ: Observation                           | Baseline <sup>a</sup> | 23.8 (5.67)        | 23.6 (6.32)      | 23.1 (5.74)  |        |                                                                     |                                                                   |                                                                           |
|                                             | Final <sup>b</sup>    | 24.4 (0.34)        | 27.9 (0.35)**    | 24.2 (0.36)  | <0.001 | 0.12 (-0.86 to 1.1)                                                 | 3.66 (2.68 to 4.64)                                               | -3.54 (-4.50 to -2.57)                                                    |
| FFMQ: Description                           | Baseline <sup>a</sup> | 33.0 (4.75)        | 31.3 (5.93)      | 32.4 (5.46)  |        |                                                                     |                                                                   |                                                                           |
|                                             | Final <sup>b</sup>    | 32.2 (0.30)        | 32.5 (0.30)      | 32.0 (0.31)  | 0.34   | 0.12 (-0.72 to 0.96)                                                | 0.48 (-0.36 to 1.32)                                              | -0.36 (-1.18 to 0.46)                                                     |
| FFMQ: Awareness                             | Baseline <sup>a</sup> | 31.5 (6.31)        | 29.7 (6.66)      | 31.7 (5.85)  |        |                                                                     |                                                                   |                                                                           |
|                                             | Final <sup>b</sup>    | 30.0 (0.39)        | 31.2 (0.39)      | 30.7 (0.41)  | 0.35   | -0.71 (-1.80 to 0.38)                                               | 0.48 (-0.63 to 1.59)                                              | -1.20 (-2.27 to -0.12)                                                    |
| FFMQ: Non-judgmental                        | Baseline <sup>a</sup> | 30.6 (4.91)        | 29.5 (5.86)      | 30.5 (5.59)  |        |                                                                     |                                                                   |                                                                           |
|                                             | Final <sup>b</sup>    | 30.2 (0.31)        | 31.6 (0.31)*     | 30.0 (0.32)  | 0.05   | 0.20 (-0.68 to 1.08)                                                | 1.60 (0.71 to 2.48)                                               | -1.39 (-2.25 to -0.52)                                                    |
| FFMQ: Non-reactivity                        | Baseline <sup>a</sup> | 23.0 (4.78)        | 22.1 (4.81)      | 22.6 (4.83)  |        |                                                                     |                                                                   |                                                                           |
|                                             | Final <sup>b</sup>    | 22.7 (0.26)        | 25.1 (0.27)**    | 23.0 (0.28)  | <0.001 | -0.35 (-1.09 to 0.39)                                               | 2.10 (1.33 to 2.86)                                               | -2.45 (-3.19 to -1.70)                                                    |
| Cortisone/Cortisol                          | Baseline <sup>a</sup> | 1.06 (0.69)        | 1.32 (0.77)      | 1.02 (0.48)  |        |                                                                     |                                                                   |                                                                           |
|                                             | Final <sup>b</sup>    | 1.67 (0.10)**      | 1.67 (0.06)**    | 1.38 (0.10)* | 0.001  | 0.29 (0.01 to 0.56)                                                 | 0.29 (0.05 to 0.52)                                               | -0.004 (-0.23 to 0.23)                                                    |

PSS denotes for Perceived Stress Scale, STAI: State-Trait Anxiety Inventory, WHO-5: WHO Five Well-being Index; FFMQ, Five Facet Mindfulness Questionnaire, SE: standard error. PSS was available for total 591 data (n=201 Mediterranean diet, 201 Stress reduction, 189 Usual care); STAI and WHO were available for 587 participants (n=201 Mediterranean diet, 202 Stress reduction, 184 Usual care); FFMQ was available for 587 participants (n=203 Mediterranean diet, 200 Stress reduction, 184 Usual care); Cortisone/ Cortisol was available for 166 participants (n=36 Usual care, 37 Mediterranean diet, 93 Stress reduction). \*P<0.05 and \*\*P<0.001 final comparison adjusted for baseline values. aBaseline values are observed as means (SD). bFinal value are baseline-adjusted (least-square) means (SE) and comparison among groups done with ANCOVA analysis. cANCOVA analysis for the final assessment.

eTable 9. Association between maternal mindful state (FFMQ) at final assessment during pregnancy (34-36 weeks' gestation) and the infant Bayley-III results in the whole study population (n=587)

| BSID assessment   | Observation           |         | Description          |         | FFMQ Awareness        |         | Non-judging          |         | Non-reactivity        |         |
|-------------------|-----------------------|---------|----------------------|---------|-----------------------|---------|----------------------|---------|-----------------------|---------|
|                   | $\beta$ (95% CI)      | p value | $\beta$ (95% CI)     | p value | $\beta$ (95% CI)      | p value | $\beta$ (95% CI)     | p value | $\beta$ (95% CI)      | p value |
| Cognitive         | 0.04 (-0.17 to 0.25)  | 0.69    | 0.10 (-0.18 to 0.38) | 0.48    | -0.15 (-0.36 to 0.06) | 0.18    | 0.07 (-0.20 to 0.34) | 0.60    | -0.10 (-0.41 to 0.21) | 0.53    |
| Language          | 0.01 (-0.20 to 0.22)  | 0.90    | 0.41 (0.13 to 0.68)  | 0.003   | 0.03 (-0.18 to 0.24)  | 0.73    | 0.21 (-0.04 to 0.46) | 0.12    | 0.23 (-0.06 to 0.52)  | 0.13    |
| Motor             | 0.04 (-0.13 to 0.21)  | 0.58    | 0.33 (0.11 to 0.54)  | 0.003   | 0.12 (-0.05 to 0.29)  | 0.17    | 0.07 (-0.12 to 0.26) | 0.50    | 0.23 (-0.005 to 0.46) | 0.06    |
| Socio-emotional   | 0.25 (-0.004 to 0.50) | 0.06    | 0.32 (-0.01 to 0.66) | 0.06    | 0.24 (-0.01 to 0.49)  | 0.08    | 0.26 (-0.05 to 0.57) | 0.11    | 0.26 (-0.11 to 0.63)  | 0.18    |
| Adaptive behavior | 0.11 (-0.08 to 0.30)  | 0.26    | 0.40 (0.15 to 0.65)  | 0.001   | 0.21 (0.01 to 0.40)   | 0.03    | 0.15 (-0.08 to 0.38) | 0.22    | 0.10 (-0.17 to 0.37)  | 0.45    |

  

| BSID assessment   | Observation           |         | Description          |         | FFMQ Awareness        |         | Non-judging          |         | Non-reactivity        |         |
|-------------------|-----------------------|---------|----------------------|---------|-----------------------|---------|----------------------|---------|-----------------------|---------|
|                   | $\beta$ (95% CI)      | p value | $\beta$ (95% CI)     | p value | $\beta$ (95% CI)      | p value | $\beta$ (95% CI)     | p value | $\beta$ (95% CI)      | p value |
| Cognitive         | 0.04 (-0.17 to 0.25)  | 0.69    | 0.10 (-0.18 to 0.38) | 0.48    | -0.15 (-0.36 to 0.06) | 0.18    | 0.07 (-0.20 to 0.34) | 0.60    | -0.10 (-0.41 to 0.21) | 0.53    |
| Language          | 0.01 (-0.20 to 0.22)  | 0.90    | 0.41 (0.13 to 0.68)  | 0.003   | 0.03 (-0.18 to 0.24)  | 0.73    | 0.21 (-0.04 to 0.46) | 0.12    | 0.23 (-0.06 to 0.52)  | 0.13    |
| Motor             | 0.04 (-0.13 to 0.21)  | 0.58    | 0.33 (0.11 to 0.54)  | 0.003   | 0.12 (-0.05 to 0.29)  | 0.17    | 0.07 (-0.12 to 0.26) | 0.50    | 0.23 (-0.005 to 0.46) | 0.06    |
| Socio-emotional   | 0.25 (-0.004 to 0.50) | 0.06    | 0.32 (-0.01 to 0.66) | 0.06    | 0.24 (-0.01 to 0.49)  | 0.08    | 0.26 (-0.05 to 0.57) | 0.11    | 0.26 (-0.11 to 0.63)  | 0.18    |
| Adaptive behavior | 0.11 (-0.08 to 0.30)  | 0.26    | 0.40 (0.15 to 0.65)  | 0.001   | 0.21 (0.01 to 0.40)   | 0.03    | 0.15 (-0.08 to 0.38) | 0.22    | 0.10 (-0.17 to 0.37)  | 0.45    |

  

| Bayley-III assessment | Observation          |         | Description          |         | FFMQ Awareness        |         | Non-judging          |         | Non-reactivity        |         |
|-----------------------|----------------------|---------|----------------------|---------|-----------------------|---------|----------------------|---------|-----------------------|---------|
|                       | $\beta$ (95% CI)     | p value | $\beta$ (95% CI)     | p value | $\beta$ (95% CI)      | p value | $\beta$ (95% CI)     | p value | $\beta$ (95% CI)      | p value |
| Cognitive             | 0.04 (-0.17 to 0.27) | 0.67    | 0.11 (-0.17 to 0.39) | 0.44    | -0.15 (-0.38 to 0.07) | 0.19    | 0.08 (-0.19 to 0.35) | 0.56    | -0.09 (-0.42 to 0.22) | 0.54    |
| Language              | 0.08 (-0.14 to 0.31) | 0.46    | 0.38 (0.11 to 0.65)  | 0.005   | 0.02 (-0.19 to 0.24)  | 0.83    | 0.21 (-0.05 to 0.47) | 0.11    | 0.31 (0.003 to 0.63)  | 0.04    |
| Motor                 | 0.06 (-0.11 to 0.24) | 0.47    | 0.32 (0.1 to 0.54)   | 0.003   | 0.12 (-0.05 to 0.29)  | 0.18    | 0.09 (-0.11 to 0.31) | 0.36    | 0.24 (-0.006 to 0.49) | 0.05    |
| Socio-emotional       | 0.20 (-0.07 to 0.48) | 0.14    | 0.30 (-0.02 to 0.64) | 0.06    | 0.25 (-0.02 to 0.52)  | 0.07    | 0.24 (-0.08 to 0.57) | 0.14    | 0.21 (-0.17 to 0.6)   | 0.28    |
| Adaptive behavior     | 0.14 (-0.06 to 0.35) | 0.17    | 0.38 (0.13 to 0.63)  | 0.002   | 0.22 (0.01 to 0.42)   | 0.03    | 0.16 (-0.07 to 0.41) | 0.18    | 0.13 (-0.15 to 0.42)  | 0.37    |

Bayley-III denotes for Bayley Scales of Infant and Toddler Development, 3rd edition, SE: standard error.

© 2023 Crovetto F et al. *JAMA Network Open*.

P values were generated from a regression model adjusted for: socioeconomic status and fetal sex.

eFigure 1. Associations between maternal Mediterranean diet adherence scores during pregnancy and the infant Bayley-III domain scores

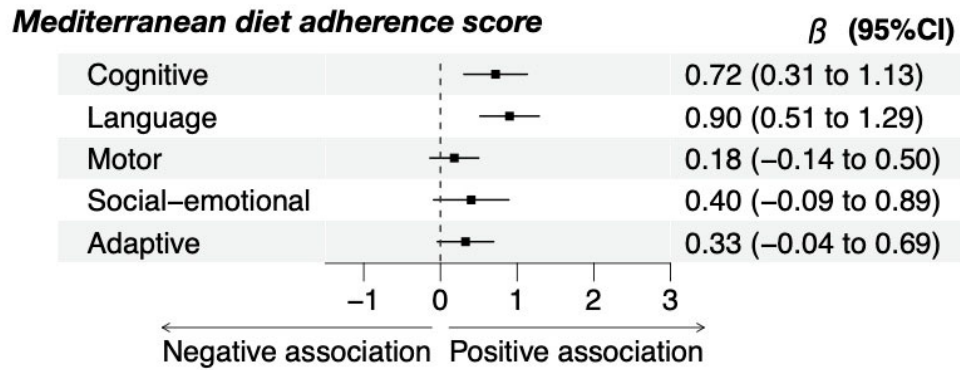



eFigure 2. Associations between maternal stress/anxiety questionnaires and the infant Bayley-III scores

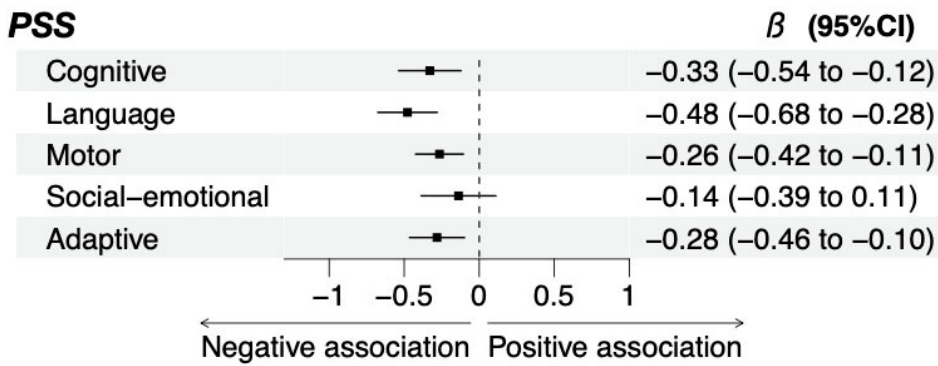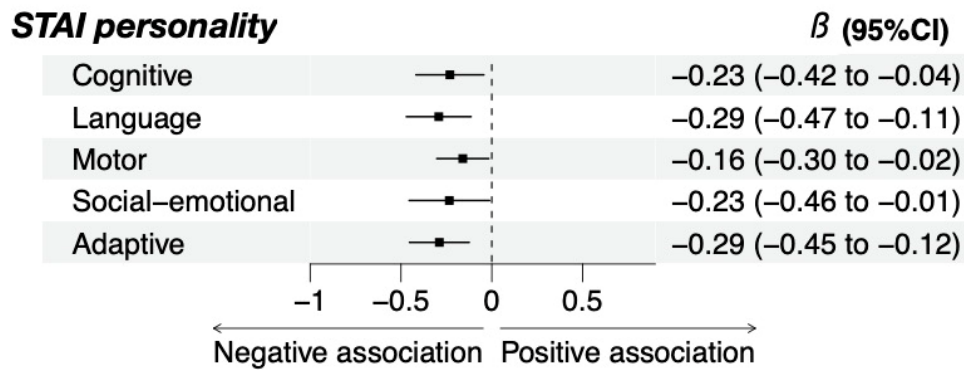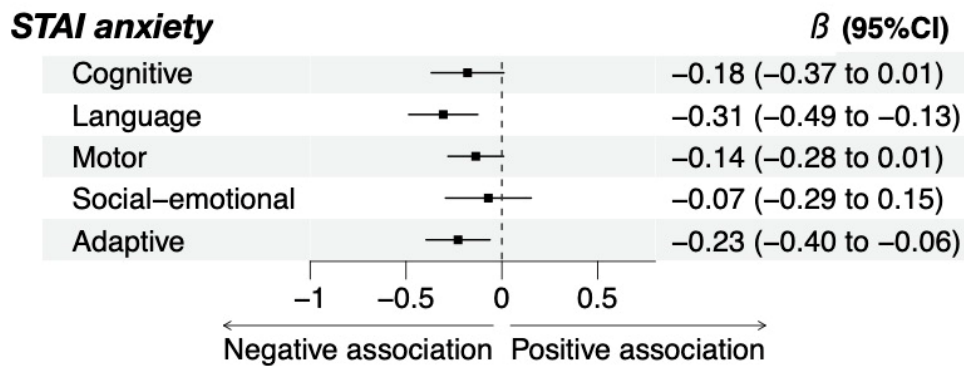

PSS denotes for Perceived Stress Scale; data were available for 591 participants (n=201 Mediterranean diet, 201 Stress reduction, 189 Usual care).

STAI denoted for State-Trait Anxiety Inventory; data were available for 587 participants (n=201 Mediterranean diet, 202 Stress reduction, 184 Usual care).

eFigure 3. Associations between infant Bayley-III scores and maternal WHO-5 score

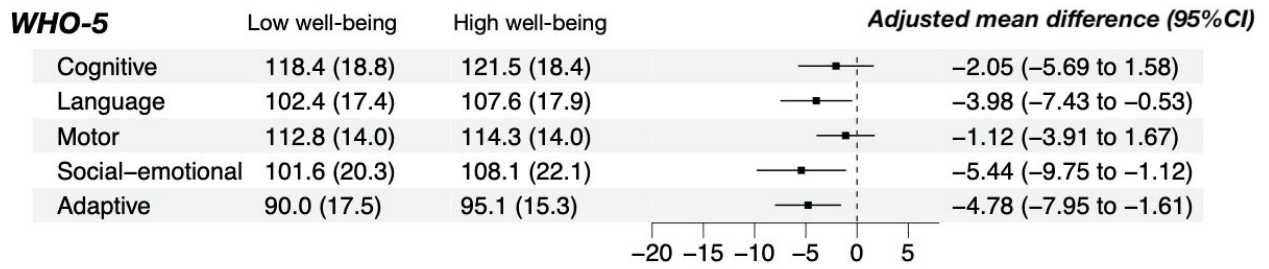

WHO-5 denotes for WHO Five Well-being Index. Data were available for 587 participants (n=203 Mediterranean diet, 198 Stress reduction, 186 Usual care)

eFigure 4. Associations between infant Bayley-III scores and maternal 24h-urinary cortisone/cortisol ratio

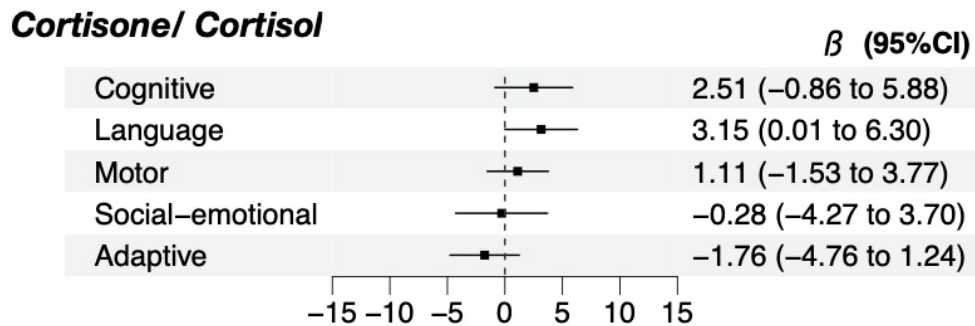

Data was available for 166 participants (n=37 Mediterranean diet, 93 Stress reduction, 36 Usual care)

eFigure 5. Mediation analysis models of intervention mechanisms\*, Casual Model .

Casual Model 1

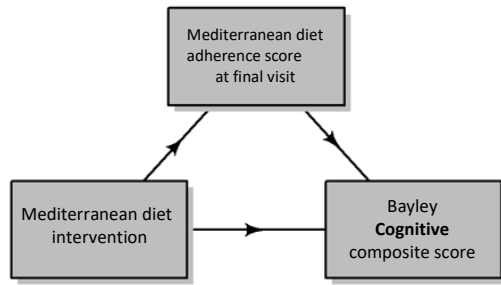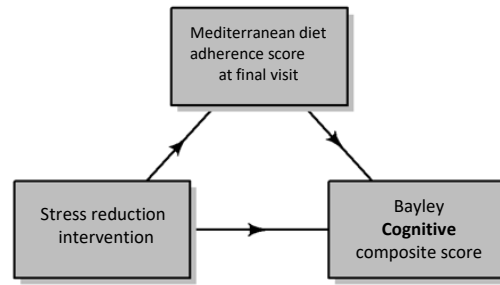

Parameters 1\*\*

|                | Estimate | 95% CI Lower | 95%CI Upper | p-value |
|----------------|----------|--------------|-------------|---------|
| ACME           | 4.005    | 1.115        | 6.72        | 0.002   |
| AADE           | 1.13     | -3.107       | 5.69        | 0.62    |
| Total Effect   | 5.135    | 1.54         | 8.8         | 0.006   |
| Prop. Mediated | 0.78     | 0.209        | 2.51        | 0.008   |

|                | Estimate | 95% CI Lower | 95%CI Upper | p-value |
|----------------|----------|--------------|-------------|---------|
| ACME           | 0.178    | -0.161       | 0.66        | 0.34    |
| AADE           | 0.676    | -3.025       | 4.35        | 0.68    |
| Total Effect   | 0.855    | -2.854       | 4.46        | 0.61    |
| Prop. Mediated | 0.208    | -1.153       | 1.52        | 0.72    |

Effect Decomposition 1

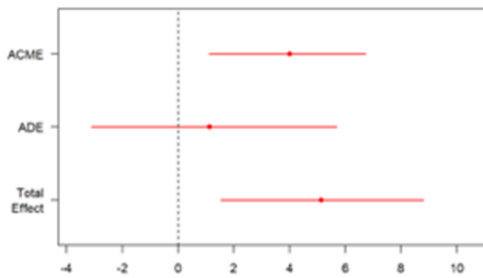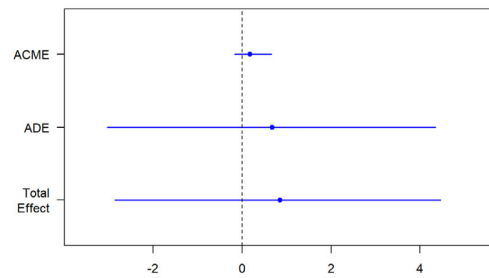

\*Causal models of intervention mechanisms, model parameters and effect decomposition. The causal models panel shows the hypothesized mechanisms of each intervention. The red lines represent the effect of the Mediterranean diet intervention and blue lines represent Stress reduction intervention. The effect decomposition panel shows how the average total effect of the intervention on the outcome is decomposed into the indirect effect, and the direct effect.

\*\*ACME: Average Causal Mediation Effects; ADE: Average Direct Effects; Total Effects and the Proportion Mediated.

eFigure 6. Mediation analysis models of intervention mechanisms\*, Casual Model 2

Casual Model 2

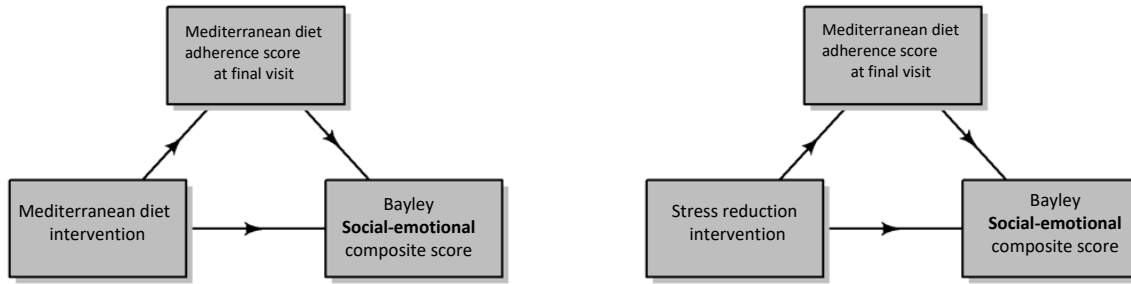

Parameters 2\*\*

|                | Estimate | 95% CI Lower | 95%CI Upper | p-value |
|----------------|----------|--------------|-------------|---------|
| ACME           | 2.252    | -0.761       | 5.62        | 0.13    |
| AADE           | 2.849    | -2.004       | 7.56        | 0.26    |
| Total Effect   | 5.102    | 1.082        | 8.98        | 0.01    |
| Prop. Mediated | 0.441    | -0.169       | 2.21        | 0.14    |

|                | Estimate | 95% CI Lower | 95%CI Upper | p-value |
|----------------|----------|--------------|-------------|---------|
| ACME           | 0.2321   | -0.2336      | 0.86        | 0.29    |
| AADE           | 4.6959   | 0.8338       | 8.76        | 0.01    |
| Total Effect   | 4.928    | 1.0878       | 8.97        | 0.01    |
| Prop. Mediated | 0.0471   | -0.0669      | 0.25        | 0.31    |

Effect Decomposition 2

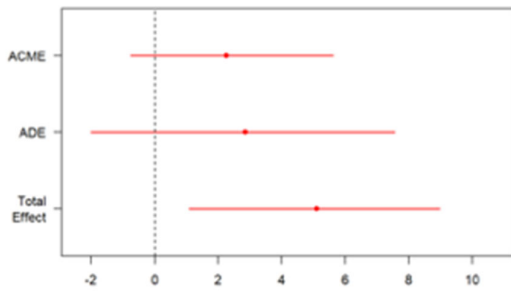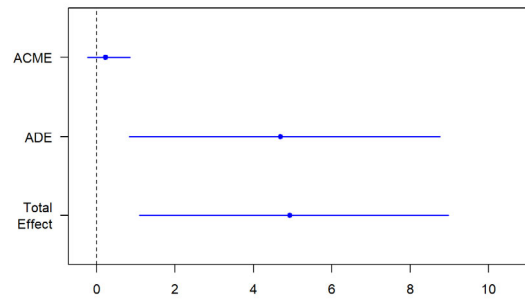

\*Causal models of intervention mechanisms, model parameters and effect decomposition. The causal models panel shows the hypothesized mechanisms of each intervention. The red lines represent the effect of the Mediterranean diet intervention and blue lines represent Stress reduction intervention. The effect decomposition panel shows how the average total effect of the intervention on the outcome is decomposed into the indirect effect, and the direct effect.

\*\*ACME: Average Causal Mediation Effects; ADE: Average Direct Effects; Total Effects and the Proportion Mediated.

eFigure 7. Mediation analysis models of intervention mechanisms\*, Casual Model 3

Casual Model 3

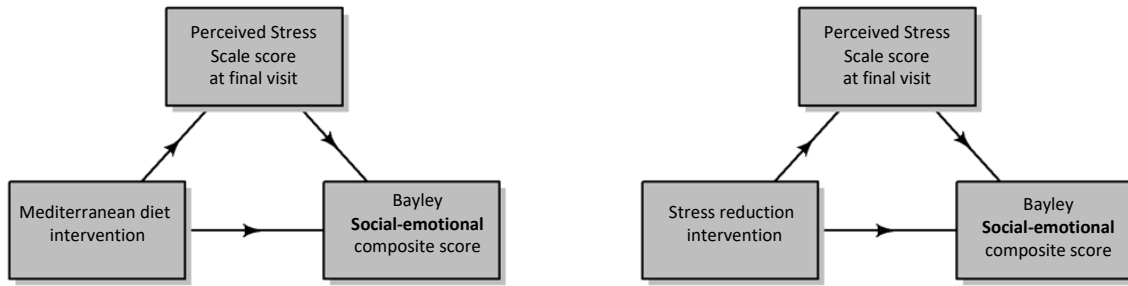

Parameters 3\*\*

|                | Estimate | 95% CI Lower | 95%CI Upper | p-value |
|----------------|----------|--------------|-------------|---------|
| ACME           | 0.3488   | -0.0904      | 1.1         | 0.16    |
| AADE           | 4.8808   | 1.0294       | 8.85        | 0.01    |
| Total Effect   | 5.2296   | 1.5089       | 9.15        | 0.01    |
| Prop. Mediated | 0.0667   | -0.0262      | 0.31        | 0.17    |

|                | Estimate | 95% CI Lower | 95%CI Upper | p-value |
|----------------|----------|--------------|-------------|---------|
| ACME           | 0.02381  | -0.20477     | 0.37        | 0.81    |
| AADE           | 5.71055  | 1.39291      | 9.51        | 0.004   |
| Total Effect   | 5.73436  | 1.42227      | 9.48        | 0.004   |
| Prop. Mediated | 0.00415  | -0.04586     | 0.1         | 0.81    |

Effect Decomposition 3

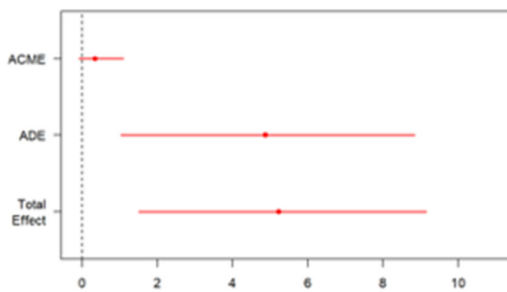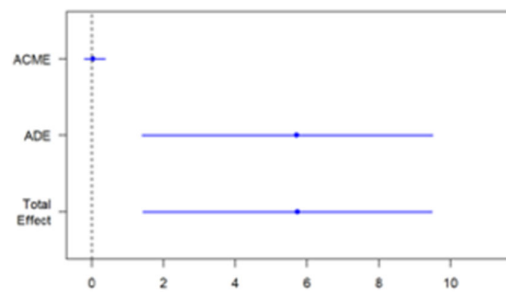

\*Causal models of intervention mechanisms, model parameters and effect decomposition. The causal models panel shows the hypothesized mechanisms of each intervention. The red lines represent the effect of the Mediterranean diet intervention and blue lines represent Stress reduction. The effect decomposition panel shows how the average total effect of the intervention on the outcome is decomposed into the indirect effect, and the direct effect.

\*\*ACME: Average Causal Mediation Effects; ADE: Average Direct Effects; Total Effects and the Proportion Mediated.

eFigure 8. Mediation analysis models of intervention mechanisms\*, Casual Model 4

Casual Model 4, sample size N=185

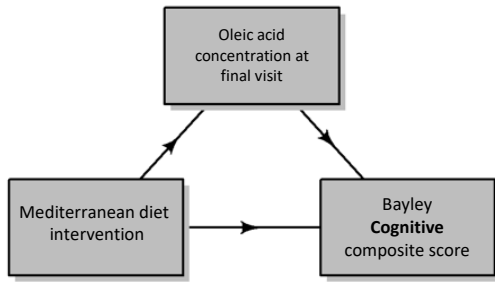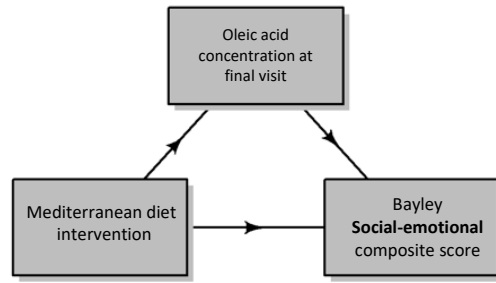

Parameters 4\*\*

|                | Estimate | 95% CI Lower | 95%CI Upper | p-value |
|----------------|----------|--------------|-------------|---------|
| ACME           | 0.02472  | -0.55268     | 0.61        | 0.95    |
| ADE            | 4.90221  | 0.329        | 9.96        | 0.044   |
| Total Effect   | 4.92693  | 0.10161      | 9.91        | 0.04    |
| Prop. Mediated | 0.00502  | -0.18028     | 0.18        | 0.962   |

|                | Estimate | 95% CI Lower | 95%CI Upper | p-value |
|----------------|----------|--------------|-------------|---------|
| ACME           | -0.475   | -1.741       | 0.7         | 0.416   |
| ADE            | 4.814    | -0.683       | 10.84       | 0.086   |
| Total Effect   | 4.339    | -1.474       | 10.37       | 0.132   |
| Prop. Mediated | -0.11    | -1.294       | 0.96        | 0.528   |

Effect Decomposition 4

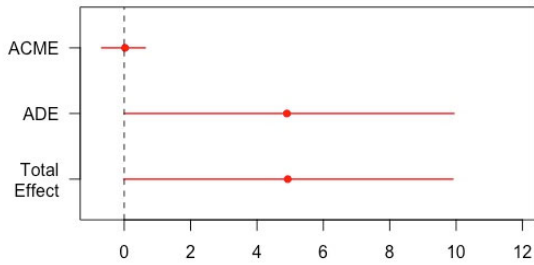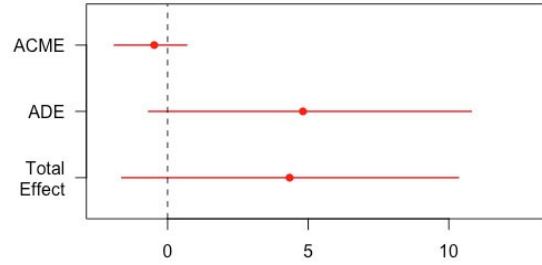

\*Causal models of intervention mechanisms, model parameters and effect decomposition. The causal models panel shows the hypothesized mechanisms of each intervention. The red lines represent the effect of the Mediterranean diet intervention and blue lines represent Stress reduction intervention. The effect decomposition panel shows how the average total effect of the intervention on the outcome is decomposed into the indirect effect, and the direct effect.

\*\*ACME: Average Causal Mediation Effects; ADE: Average Direct Effects; Total Effects and the Proportion Mediated.

eFigure 9. Mediation analysis models of intervention mechanisms\*, Casual Model 5

Casual Model 5, sample size N=185

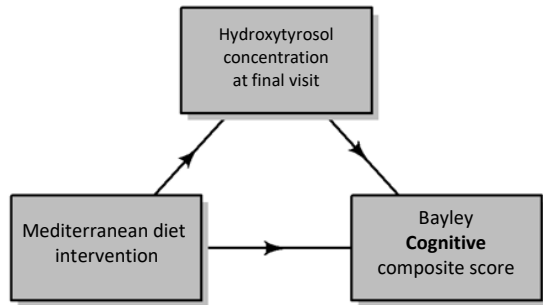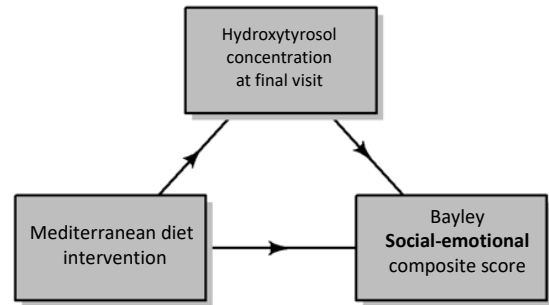

Parameters 5\*\*

|                | Estimate | 95% CI Lower | 95%CI Upper | p-value |
|----------------|----------|--------------|-------------|---------|
| ACME           | 0.153    | -0.5406      | 0.93        | 0.724   |
| ADE            | 4.6804   | -0.6023      | 9.94        | 0.092   |
| Total Effect   | 4.8334   | -0.4476      | 10.12       | 0.068   |
| Prop. Mediated | 0.0317   | -0.2684      | 0.43        | 0.764   |

|                | Estimate | 95% CI Lower | 95%CI Upper | p-value |
|----------------|----------|--------------|-------------|---------|
| ACME           | 0.1365   | -0.5114      | 1.08        | 0.70    |
| ADE            | 4.2073   | -1.9148      | 10.16       | 0.17    |
| Total Effect   | 4.3438   | -1.8629      | 10.21       | 0.15    |
| Prop. Mediated | 0.0314   | -0.521       | 0.75        | 0.74    |

Effect Decomposition 5

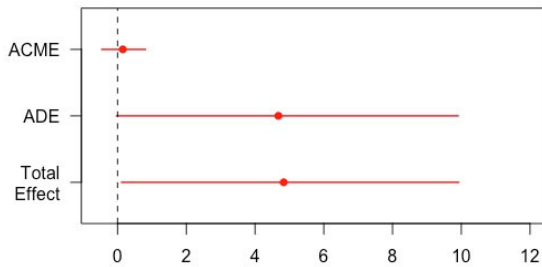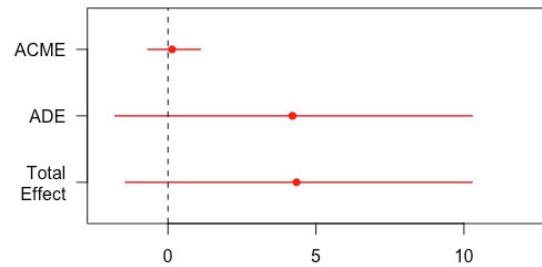

\*Causal models of intervention mechanisms, model parameters and effect decomposition. The causal models panel shows the hypothesized mechanisms of each intervention. The red lines represent the effect of the Mediterranean diet intervention and blue lines represent Stress reduction intervention. The effect decomposition panel shows how the average total effect of the intervention on the outcome is decomposed into the indirect effect, and the direct effect.

\*\*ACME: Average Causal Mediation Effects; ADE: Average Direct Effects; Total Effects and the Proportion Mediated.



eFigure 10. Mediation analysis models of intervention mechanisms\*, Casual Model 6

Casual Model 6, sample size N=129

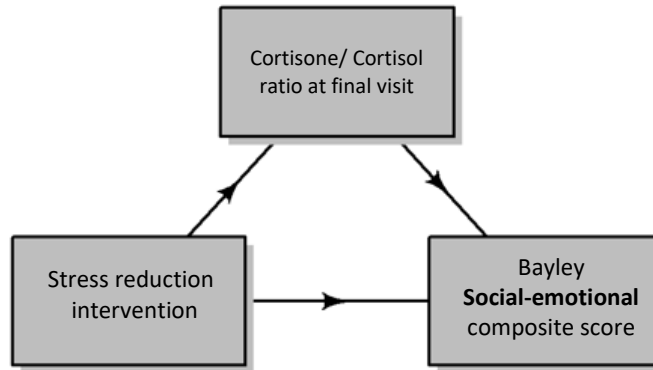

Parameters 6\*\*

|                | Estimate | 95% CI Lower | 95%CI Upper | p-value |
|----------------|----------|--------------|-------------|---------|
| ACME           | -0.492   | -2.519       | 1.15        | 0.53    |
| ADE            | -0.333   | -7.464       | 6.54        | 0.95    |
| Total Effect   | -0.825   | -7.854       | 5.72        | 0.84    |
| Prop. Mediated | 0.596    | -2.353       | 4.84        | 0.95    |

Effect Decomposition 6

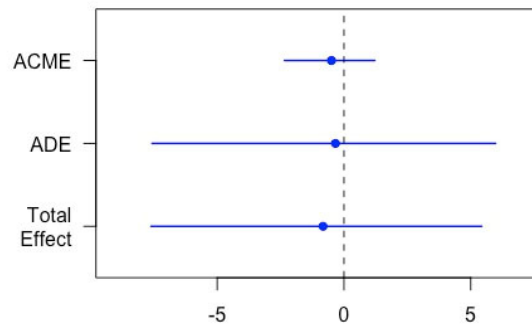

\*Causal models of intervention mechanisms, model parameters and effect decomposition. The causal models panel shows the hypothesized mechanisms of each intervention. The red lines represent the effect of the Mediterranean diet intervention and blue lines represent Stress reduction intervention. The effect decomposition panel shows how the average total effect of the intervention on the outcome is decomposed into the indirect effect, and the direct effect.

\*\*ACME: Average Causal Mediation Effects; ADE: Average Direct Effects; Total Effects and the Proportion Mediated.

## eReferences

1. Crowley T. The Investigation and Management of the Small-for-Gestational-Age Fetus. Published online January 21, 2014:1-34.
2. Lee H, Cashin AG, Lamb SE, et al. A Guideline for Reporting Mediation Analyses of Randomized Trials and Observational Studies: The AGRReMA Statement. *JAMA*. 2021;326(11):1045. doi:10.1001/jama.2021.14075
3. Tingley D, Yamamoto T, Hirose K, Keele L, Imai K. "mediation : R Package for Causal Mediation Analysis." *J Stat Soft*. 2014;59(5). doi:10.18637/jss.v059.i05
4. Mataix, J. *Tablas de Composición de Alimentos [Food Composition Tables]* Mataix, J. 4th ed. Universidad de Granada: Granada, Spain; 2003.
5. Moreiras, O., Carbajal, A., Cabrera, L., Hoyos, M.D.C.C. *Tablas de Composición de Alimentos. Guía de Prácticas; Ediciones Pirámide (Grupo Anaya, SA);* 2018.
