# Supplementary material for: Effect of a Mediterranean Diet or Mindfulness-Based Stress Reduction During Pregnancy on Child Neurodevelopment: A Prespecified Analysis of the IMPACT BCN Randomized Clinical Trial
Source: PubMed Central journal article supplement — JAMA Netw Open. 2023 Aug 22;6(8):e2330255. doi: 10.1001/jamanetworkopen.2023.30255 (PMC10445211; doi:10.1001/jamanetworkopen.2023.30255), 2023-08-22
Supplement: jamanetwopen-e2330255-s003.pdf [file jamanetwopen-e2330255-s003.pdf]

## Data Sharing Statement

Crovetto. Effect of a Mediterranean Diet or Mindfulness-Based Stress Reduction During Pregnancy on Child Neurodevelopment. *JAMA Netw Open*. Published August 22, 2023. doi:10.1001/jamanetworkopen.2023.30255

### Data

**Data available:** Yes

**Data types:** Deidentified participant data, Participant data with identifiers

**How to access data:** [francesca.crovetto@sjd.es](mailto:francesca.crovetto@sjd.es); [anakaki@clinic.cat](mailto:anakaki@clinic.cat)

**When available:** With publication

### Supporting Documents

**Document types:** Statistical/analytic code

**How to access documents:** [francesca.crovetto@sjd.es](mailto:francesca.crovetto@sjd.es); [anakaki@clinic.cat](mailto:anakaki@clinic.cat)

**When available:** With publication

### Additional Information

**Who can access the data:** Researchers whose proposed use of the data has been approved by the Ethical committee

**Types of analyses:** For specified purpose

**Mechanisms of data availability:** With investigator support
